# Supplementary material for: A facile method for the synthesis of the Li0.3La0.57TiO3 solid state electrolyte
Source: Royal Society of Chemistry journal article supplement (doi:10.1039/c4cc00335g), 2014-01-01
Supplement: c4cc00335g1.pdf [file c4cc00335g1.pdf]

Supplementary Material (ESI) for Chemical Communications  
This journal is (c) The Royal Society of Chemistry 2014

## Supporting Information

### TGA result

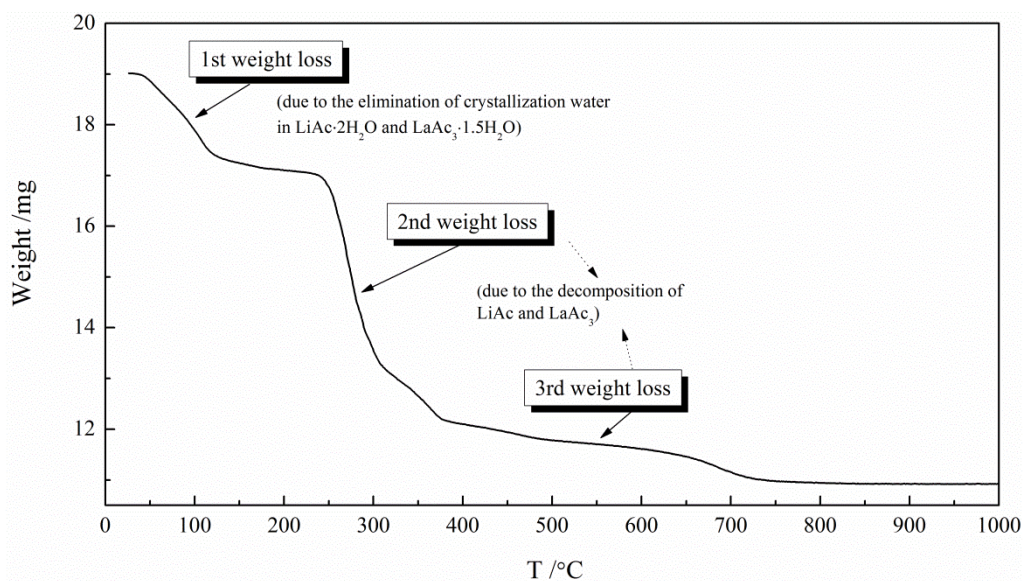

**Fig. S1** TGA plot of the precursor powder that contains  $\text{LiAc}\cdot 2\text{H}_2\text{O}$ ,  $\text{LaAc}_3\cdot 1.5\text{H}_2\text{O}$ , and  $\text{TiO}_2$  used for the synthesis of lithium lanthanum titanate.
